# Supplementary material
Source: Springer Nature journal article supplement (https://www.springermedizin.de/resource/supplementary/12943_2009_666_MOESM5_ESM.pdf/9554522)

fold expression

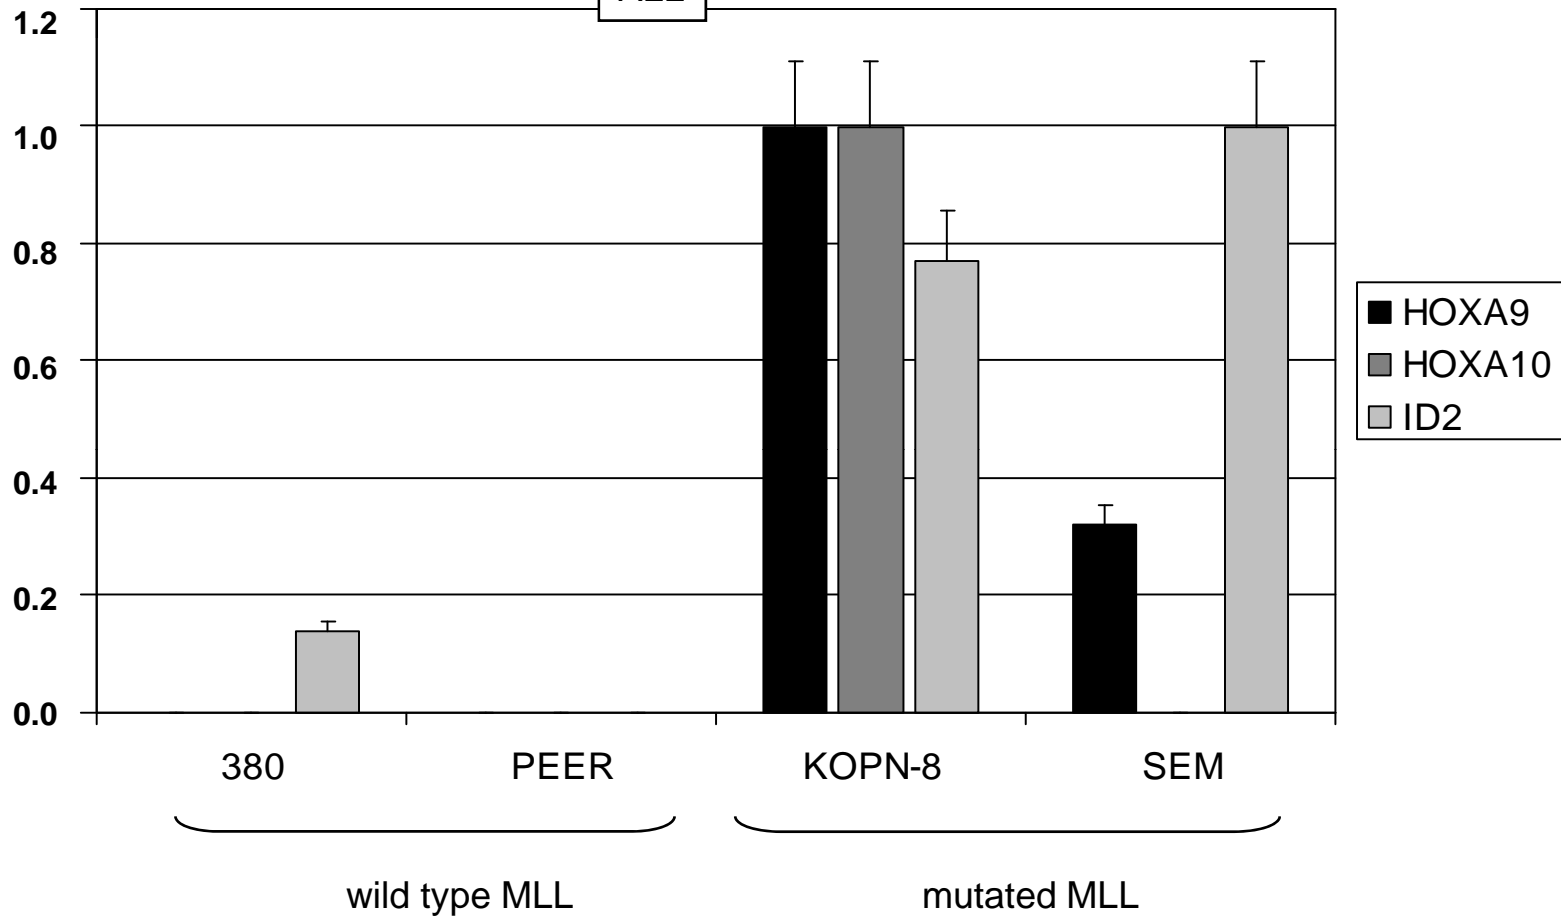

Supplement: MOESM5 [file 9554522]
